# Supplementary material for: Cryo-Electron Tomography Reveals the Complex Ultrastructural Organization of Multicellular Filamentous Chloroflexota (Chloroflexi) Bacteria
Source: Front Microbiol. 2020 Jun 26;11:1373. doi: 10.3389/fmicb.2020.01373 (PMC7332563; doi:10.3389/fmicb.2020.01373)
Supplement: Supplementary file 1 [file Table_1.XLSX]

## Sheet: Table_S1
Table S1. Distribution of the key genes across genomes of Chloroflexota bacteria
Organism name	Assembly accession	NCBI Taxonomy	GTDB Taxonomy	Lipopolysaccharide Biosynthesis
Organism name			GTDB Taxonomy	Lipid A																			Core region
				K00748	K00677	K02536	K02517	K02560	K19803	K12973	K12974	K03760	K02535	K12976	K09953	K03269	K07264	K00912	K12977	K12978	K12979	K12980	K02527	K12981	K02841	K02843	K02849	K03277	K12982	K02844	K03275	K03276	K03279	K12983	K12984	K02840	K03278	K12985	K03280	K12986	K12987	K12988	K12989	K02848	K02850	K12975	K19353	K00713	K19354
				lpxB	lpxA	lpxD	lpxL	lpxM	lpxT	pagP	lpxP	eptA	lpxC	pagL	lpxR	lpxH	arnT	lpxK	lpxE	lpxF	lpxO	lpxQ	kdtA	waaZ	waaC	waaF	waaQ	waaU	opsX	waaG	waaO	waaR	waaJ	waaV	waaE	waaB	waaI	waaW	waaK	waaS	migA	wapR	lpcC	waaP	waaY	eptB	eptC	waaD	waaH
Ca. Chloroploca asiatica B7-9	GCF_002532075.1	d__Bacteria; p__Chloroflexi; c__Chloroflexia; o__Chloroflexales; f__Oscillochloridaceae; g__Candidatus Chloroploca; s__Candidatus Chloroploca asiatica	d__Bacteria; p__Chloroflexota; c__Chloroflexia; o__Chloroflexales; f__Chloroflexaceae; g__Chloroploca; s__Chloroploca asiatica	0	0	0	0	0	0	0	0	0	0	0	0	0	0	0	0	0	0	0	0	0	1	1	1	0	0	0	0	0	0	0	1	0	0	0	0	0	2	2	0	0	0	0	0	0	1
Ca. Viridilinea mediisalina Kir15-3F	GCF_002532535.1	d__Bacteria; p__Chloroflexi; c__; o__; f__; g__; s__	d__Bacteria; p__Chloroflexota; c__Chloroflexia; o__Chloroflexales; f__Chloroflexaceae; g__Chloroploca; s__Chloroploca sp002532535	0	0	0	0	0	0	0	0	0	0	0	0	0	0	0	0	0	0	0	0	0	0	1	1	0	0	0	0	0	0	0	1	0	0	0	0	0	0	0	0	0	0	0	0	0	0
Oscillochloris trichoides DG-6	GCF_000152145.1	d__Bacteria; p__Chloroflexi; c__Chloroflexia; o__Chloroflexales; f__Oscillochloridaceae; g__Oscillochloris; s__Oscillochloris trichoides	d__Bacteria; p__Chloroflexota; c__Chloroflexia; o__Chloroflexales; f__Chloroflexaceae; g__Oscillochloris; s__Oscillochloris trichoides	0	0	0	0	0	0	0	0	0	0	0	0	0	0	0	0	0	0	0	0	0	1	1	1	0	1	0	0	0	0	0	1	0	0	0	0	0	1	0	1	0	0	0	0	0	0
Chloroflexus aggregans DSM 9485	GCF_000021945.1	d__Bacteria; p__Chloroflexi; c__Chloroflexia; o__Chloroflexales; f__Chloroflexaceae; g__Chloroflexus; s__Chloroflexus aggregans	d__Bacteria; p__Chloroflexota; c__Chloroflexia; o__Chloroflexales; f__Chloroflexaceae; g__Chloroflexus; s__Chloroflexus aggregans	0	0	0	0	0	0	0	0	0	0	0	0	0	0	0	0	0	0	0	0	0	1	1	1	0	0	0	0	0	0	0	1	0	0	0	0	0	1	0	1	0	0	0	0	0	0
Chloroflexus aurantiacus J-10-fl	GCF_000018865.1	d__Bacteria; p__Chloroflexi; c__Chloroflexia; o__Chloroflexales; f__Chloroflexaceae; g__Chloroflexus; s__Chloroflexus aurantiacus	d__Bacteria; p__Chloroflexota; c__Chloroflexia; o__Chloroflexales; f__Chloroflexaceae; g__Chloroflexus; s__Chloroflexus aurantiacus	0	0	0	0	0	0	0	0	0	0	0	0	0	0	0	0	0	0	0	0	0	1	1	1	0	0	0	0	0	0	0	1	0	0	0	0	0	0	0	0	0	0	0	0	0	0
Chloroflexus islandicus isl-2	GCF_001650695.1	d__Bacteria; p__Chloroflexi; c__Chloroflexia; o__Chloroflexales; f__Chloroflexaceae; g__Chloroflexus; s__Chloroflexus islandicus	d__Bacteria; p__Chloroflexota; c__Chloroflexia; o__Chloroflexales; f__Chloroflexaceae; g__Chloroflexus; s__Chloroflexus islandicus	0	0	0	0	0	0	0	0	0	0	0	0	0	0	0	0	0	0	0	0	0	1	1	1	0	0	0	0	0	0	0	1	0	0	0	0	0	0	0	1	0	0	0	0	0	0
Chloroflexus sp. Y-396-1	GCF_000516515.1	d__Bacteria; p__Chloroflexi; c__Chloroflexia; o__Chloroflexales; f__Chloroflexaceae; g__Chloroflexus; s__	d__Bacteria; p__Chloroflexota; c__Chloroflexia; o__Chloroflexales; f__Chloroflexaceae; g__Chloroflexus; s__Chloroflexus sp000516515	0	0	0	0	0	0	0	0	0	0	0	0	0	0	0	0	0	0	0	0	0	1	1	1	0	0	0	0	0	0	0	1	0	0	0	0	0	0	0	1	0	0	0	0	0	0
Chloroflexus sp. MS-G	GCF_000735195.1	d__Bacteria; p__Chloroflexi; c__Chloroflexia; o__Chloroflexales; f__Chloroflexaceae; g__Chloroflexus; s__	d__Bacteria; p__Chloroflexota; c__Chloroflexia; o__Chloroflexales; f__Chloroflexaceae; g__Chloroflexus; s__Chloroflexus sp000735195	0	0	0	0	0	0	0	0	0	0	0	0	0	0	0	0	0	0	0	0	0	1	1	1	0	0	0	0	0	0	0	1	0	0	0	0	0	0	0	1	0	0	0	0	0	0
Roseiflexus castenholzii DSM 13941	GCF_000017805.1	d__Bacteria; p__Chloroflexi; c__Chloroflexia; o__Chloroflexales; f__Roseiflexaceae; g__Roseiflexus; s__Roseiflexus castenholzii	d__Bacteria; p__Chloroflexota; c__Chloroflexia; o__Chloroflexales; f__Roseiflexaceae; g__Roseiflexus; s__Roseiflexus castenholzii	0	0	0	0	0	0	0	0	0	0	0	0	0	0	0	0	0	0	0	0	0	0	0	0	0	0	0	0	0	0	0	1	0	0	0	0	0	1	1	1	0	0	0	0	0	0
Roseiflexus sp. RS-1	GCF_000016665.1	d__Bacteria; p__Chloroflexi; c__Chloroflexia; o__Chloroflexales; f__Roseiflexaceae; g__Roseiflexus; s__	d__Bacteria; p__Chloroflexota; c__Chloroflexia; o__Chloroflexales; f__Roseiflexaceae; g__Roseiflexus; s__Roseiflexus sp000016665	0	0	0	0	0	0	0	0	0	0	0	0	0	0	0	0	0	0	0	0	0	0	0	0	0	0	0	0	0	0	0	1	0	0	0	0	0	2	1	1	0	0	0	0	0	0
Kouleothrix aurantiaca COM-B	GCA_001399705.1	d__Bacteria; p__Chloroflexi; c__; o__; f__; g__Kouleothrix; s__Kouleothrix aurantiaca	d__Bacteria; p__Chloroflexota; c__Chloroflexia; o__Chloroflexales; f__Roseiflexaceae; g__Kouleothrix; s__Kouleothrix aurantiaca	0	0	0	0	0	0	0	0	0	0	0	0	0	0	0	0	0	0	0	0	0	0	0	0	0	0	0	0	0	0	0	1	0	0	0	0	0	1	2	0	0	0	0	0	0	0
Herpetosiphon aurantiacus DSM 785	GCA_000018565.1	d__Bacteria; p__Chloroflexi; c__Chloroflexia; o__Herpetosiphonales; f__Herpetosiphonaceae; g__Herpetosiphon; s__Herpetosiphon aurantiacus	d__Bacteria; p__Chloroflexota; c__Chloroflexia; o__Chloroflexales; f__Herpetosiphonaceae; g__Herpetosiphon; s__Herpetosiphon aurantiacus	0	0	0	2	0	0	0	0	0	0	0	0	0	0	0	0	0	0	0	0	0	0	2	1	0	0	0	0	0	0	0	1	0	0	0	0	0	0	0	0	0	0	0	0	0	0
Herpetosiphon geysericola DSM 7119	GCF_001306135.1	d__Bacteria; p__Chloroflexi; c__Chloroflexia; o__Herpetosiphonales; f__Herpetosiphonaceae; g__Herpetosiphon; s__Herpetosiphon geysericola	d__Bacteria; p__Chloroflexota; c__Chloroflexia; o__Chloroflexales; f__Herpetosiphonaceae; g__Herpetosiphon; s__Herpetosiphon geysericola	0	0	0	2	0	0	0	0	0	0	0	0	0	0	0	0	0	0	0	0	0	1	2	1	0	0	0	0	0	0	0	1	0	0	0	0	0	0	0	0	0	0	0	0	0	0
Kallotenue papyrolyticum JKG1	GCF_000526415.1	d__Bacteria; p__; c__; o__; f__; g__; s__	d__Bacteria; p__Chloroflexota; c__Chloroflexia; o__Chloroflexales; f__Herpetosiphonaceae; g__JKG1; s__JKG1 sp000526415	0	0	0	0	0	0	0	0	0	0	0	0	0	0	0	0	0	0	0	0	0	6	7	6	0	2	0	0	0	0	0	1	0	0	0	0	0	0	0	2	0	0	0	0	0	0
Thermobaculum terrenum ATCC BAA-798	GCF_000025005.1	d__Bacteria; p__; c__; o__; f__; g__Thermobaculum; s__Thermobaculum terrenum	d__Bacteria; p__Chloroflexota; c__Chloroflexia; o__Thermobaculales; f__Thermobaculaceae; g__Thermobaculum; s__Thermobaculum terrenum	0	0	0	1	0	0	0	0	0	0	0	0	0	0	0	0	0	0	0	0	0	1	3	0	0	0	0	0	0	0	0	0	0	0	0	0	0	0	0	0	0	0	0	0	0	0
Nitrolancea hollandica Lb	GCF_000297255.1	d__Bacteria; p__Chloroflexi; c__Thermomicrobia; o__Sphaerobacterales; f__Sphaerobacteraceae; g__Nitrolancea; s__Nitrolancea hollandica	d__Bacteria; p__Chloroflexota; c__Chloroflexia; o__Thermomicrobiales; f__Thermomicrobiaceae; g__Nitrolancea; s__Nitrolancea hollandica	0	0	0	1	0	0	0	0	0	0	0	0	0	0	0	0	0	0	0	0	0	4	6	5	0	1	0	0	0	0	0	0	0	0	0	0	0	0	0	1	0	0	0	0	0	0
Thermomicrobium roseum DSM 5159	GCF_000021685.1	d__Bacteria; p__Chloroflexi; c__Thermomicrobia; o__Thermomicrobiales; f__Thermomicrobiaceae; g__Thermomicrobium; s__Thermomicrobium roseum	d__Bacteria; p__Chloroflexota; c__Chloroflexia; o__Thermomicrobiales; f__Thermomicrobiaceae; g__Thermomicrobium; s__Thermomicrobium roseum	0	0	0	2	0	0	0	0	0	0	0	0	0	0	0	0	0	0	0	0	0	2	3	3	0	0	0	0	0	0	0	0	0	0	0	0	0	0	0	1	0	0	0	0	0	0
Thermorudis peleae KI4	GCF_000744775.1	d__Bacteria; p__Chloroflexi; c__Thermomicrobia; o__; f__; g__Thermorudis; s__Thermorudis peleae	d__Bacteria; p__Chloroflexota; c__Chloroflexia; o__Thermomicrobiales; f__Thermomicrobiaceae; g__Thermorudis; s__Thermorudis peleae	0	0	0	2	0	0	0	0	0	0	0	0	0	0	0	0	0	0	0	0	0	4	6	5	0	0	0	0	0	0	0	0	0	0	0	0	0	0	0	0	0	0	0	0	0	0
Ktedonobacter racemifer DSM 44963	GCF_000178855.1	d__Bacteria; p__Chloroflexi; c__Ktedonobacteria; o__Ktedonobacterales; f__Ktedonobacteraceae; g__Ktedonobacter; s__Ktedonobacter racemifer	d__Bacteria; p__Chloroflexota; c__Ktedonobacteria; o__Ktedonobacterales; f__Ktedonobacteraceae; g__Ktedonobacter; s__Ktedonobacter racemifer	0	0	0	0	0	0	0	0	0	0	0	0	0	0	0	0	0	0	0	0	0	3	4	3	0	0	0	0	0	0	0	0	0	0	0	0	0	0	0	0	0	0	0	0	0	0
Thermogemmatispora carboxidivorans PM5	GCF_000702505.1	d__Bacteria; p__Chloroflexi; c__Ktedonobacteria; o__Thermogemmatisporales; f__Thermogemmatisporaceae; g__Thermogemmatispora; s__Thermogemmatispora carboxidivorans	d__Bacteria; p__Chloroflexota; c__Ktedonobacteria; o__Ktedonobacterales; f__Ktedonobacteraceae; g__Thermogemmatispora; s__Thermogemmatispora carboxidivorans	0	0	0	2	0	0	0	0	0	0	0	0	0	0	0	0	0	0	0	0	0	5	5	4	0	1	0	0	0	0	0	0	0	0	0	0	0	0	0	0	0	0	0	0	0	0
Thermogemmatispora onikobensis NBRC 111776	GCF_001748285.1	d__Bacteria; p__Chloroflexi; c__Ktedonobacteria; o__Thermogemmatisporales; f__Thermogemmatisporaceae; g__Thermogemmatispora; s__Thermogemmatispora onikobensis	d__Bacteria; p__Chloroflexota; c__Ktedonobacteria; o__Ktedonobacterales; f__Ktedonobacteraceae; g__Thermogemmatispora; s__Thermogemmatispora onikobensis	0	0	0	2	0	0	0	0	0	0	0	0	0	0	0	0	0	0	0	0	0	8	7	6	0	1	0	0	0	0	0	0	0	0	0	0	0	0	0	0	0	0	0	0	0	0
Ardenticatena maritima 110S	GCF_001306175.1	d__Bacteria; p__Chloroflexi; c__Ardenticatenia; o__Ardenticatenales; f__Ardenticatenaceae; g__Ardenticatena; s__Ardenticatena maritima	d__Bacteria; p__Chloroflexota; c__Anaerolineae; o__Ardenticatenales; f__Ardenticatenaceae; g__Ardenticatena; s__Ardenticatena maritima	0	0	0	1	0	0	0	0	0	0	0	0	0	0	0	0	0	0	0	0	0	3	3	3	0	2	0	0	0	0	0	1	0	0	0	0	0	0	0	1	0	0	0	0	0	0
Caldilinea aerophila DSM 14535	GCF_000281175.1	d__Bacteria; p__Chloroflexi; c__Caldilineae; o__Caldilineales; f__Caldilineaceae; g__Caldilinea; s__Caldilinea aerophila	d__Bacteria; p__Chloroflexota; c__Anaerolineae; o__Caldilineales; f__Caldilineaceae; g__Caldilinea; s__Caldilinea aerophila	0	0	0	0	0	0	0	0	0	0	0	0	0	0	0	0	0	0	0	0	0	0	0	0	0	0	1	0	0	0	0	1	0	0	0	0	0	0	0	1	0	0	0	0	0	0
Litorilinea aerophila PRI-413	GCA_002148365.1	d__Bacteria; p__Chloroflexi; c__Caldilineae; o__Caldilineales; f__Caldilineaceae; g__Litorilinea; s__Litorilinea aerophila	d__Bacteria; p__Chloroflexota; c__Anaerolineae; o__Caldilineales; f__Caldilineaceae; g__Litorilinea; s__Litorilinea aerophila	0	0	0	0	0	0	0	0	0	0	0	0	0	0	0	0	0	0	0	0	0	0	0	0	0	0	0	0	0	0	0	1	0	0	0	0	0	0	0	0	0	0	0	0	0	0
Ca. Promineofilum breve Cfx-K	GCF_900066015.1	d__Bacteria; p__Chloroflexi; c__Ardenticatenia; o__Ardenticatenales; f__Ardenticatenaceae; g__Candidatus Promineofilum; s__Candidatus Promineofilum breve	d__Bacteria; p__Chloroflexota; c__Anaerolineae; o__Promineofilales; f__Promineofilaceae; g__Promineofilum; s__Promineofilum breve	0	0	0	0	0	0	0	0	0	0	0	0	0	0	0	0	0	0	0	0	0	0	0	0	0	0	0	0	0	0	0	1	0	0	0	0	0	1	0	0	0	0	0	0	0	0
Thermoflexus hugenholtzii JAD2	GCF_900187885.1	d__Bacteria; p__Chloroflexi; c__Thermoflexia; o__Thermoflexales; f__Thermoflexaceae; g__Thermoflexus; s__Thermoflexus hugenholtzii	d__Bacteria; p__Chloroflexota; c__Anaerolineae; o__Thermoflexales; f__Thermoflexaceae; g__Thermoflexus; s__Thermoflexus hugenholtzii	0	0	0	1	0	0	0	0	0	0	0	0	0	0	0	0	0	0	0	0	0	0	0	0	0	0	0	0	0	0	0	1	0	0	0	0	0	0	0	0	0	0	0	0	0	0
Anaerolinea thermolimosa IMO-1	GCF_001050195.1	d__Bacteria; p__Chloroflexi; c__Anaerolineae; o__Anaerolineales; f__Anaerolineaceae; g__Anaerolinea; s__Anaerolinea thermolimosa	d__Bacteria; p__Chloroflexota; c__Anaerolineae; o__Anaerolineales; f__Anaerolineaceae; g__Anaerolinea; s__Anaerolinea thermolimosa	0	0	0	1	0	0	0	0	0	0	0	0	0	0	0	0	0	0	0	0	0	0	0	0	0	0	0	0	0	0	0	0	0	0	0	0	0	1	1	0	0	0	0	0	0	0
Anaerolinea thermophila UNI-1	GCF_000199675.1	d__Bacteria; p__Chloroflexi; c__Anaerolineae; o__Anaerolineales; f__Anaerolineaceae; g__Anaerolinea; s__Anaerolinea thermophila	d__Bacteria; p__Chloroflexota; c__Anaerolineae; o__Anaerolineales; f__Anaerolineaceae; g__Anaerolinea; s__Anaerolinea thermophila	0	0	0	1	0	0	0	0	0	0	0	0	0	0	0	0	0	0	0	0	0	0	0	0	0	0	0	0	0	0	0	0	0	0	0	0	0	0	0	0	0	0	0	0	0	0
Bellilinea caldifistulae GOMI-1	GCF_001306055.1	d__Bacteria; p__Chloroflexi; c__Anaerolineae; o__Anaerolineales; f__Anaerolineaceae; g__Bellilinea; s__Bellilinea caldifistulae	d__Bacteria; p__Chloroflexota; c__Anaerolineae; o__Anaerolineales; f__Anaerolineaceae; g__Bellilinea; s__Bellilinea caldifistulae	0	0	0	1	0	0	0	0	0	0	0	0	0	0	0	0	0	0	0	0	0	0	0	0	0	0	0	0	0	0	0	0	0	0	0	0	0	1	1	0	0	0	0	0	0	0
Brevefilum fermentans CAMBI-1	GCF_900184705.1	d__Bacteria; p__Chloroflexi; c__Anaerolineae; o__Anaerolineales; f__Anaerolineaceae; g__Brevefilum; s__Brevefilum fermentans	d__Bacteria; p__Chloroflexota; c__Anaerolineae; o__Anaerolineales; f__Anaerolineaceae; g__Brevefilum; s__Brevefilum fermentans	0	0	0	1	0	0	0	0	0	0	0	0	0	0	0	0	0	0	0	0	0	0	0	0	0	0	0	0	0	0	0	0	0	0	0	0	0	0	0	0	0	0	0	0	0	0
Leptolinea tardivitalis YMTK-2	GCF_001050275.1	d__Bacteria; p__Chloroflexi; c__Anaerolineae; o__Anaerolineales; f__Anaerolineaceae; g__Leptolinea; s__Leptolinea tardivitalis	d__Bacteria; p__Chloroflexota; c__Anaerolineae; o__Anaerolineales; f__Anaerolineaceae; g__Leptolinea; s__Leptolinea tardivitalis	0	0	0	0	0	0	0	0	0	0	0	0	0	0	0	0	0	0	0	0	0	0	0	0	0	0	0	0	0	0	0	0	0	0	0	0	0	0	0	0	0	0	0	0	0	0
Levilinea saccharolytica KIBI-1	GCF_001306035.1	d__Bacteria; p__Chloroflexi; c__Anaerolineae; o__Anaerolineales; f__Anaerolineaceae; g__Levilinea; s__Levilinea saccharolytica	d__Bacteria; p__Chloroflexota; c__Anaerolineae; o__Anaerolineales; f__Anaerolineaceae; g__Levilinea; s__Levilinea saccharolytica	0	0	0	0	0	0	0	0	0	0	0	0	0	0	0	0	0	0	0	0	0	0	0	0	0	0	0	0	0	0	0	0	0	0	0	0	0	0	0	0	0	0	0	0	0	0
Longilinea arvoryzae KOME-1	GCF_001050235.1	d__Bacteria; p__Chloroflexi; c__Anaerolineae; o__Anaerolineales; f__Anaerolineaceae; g__Longilinea; s__Longilinea arvoryzae	d__Bacteria; p__Chloroflexota; c__Anaerolineae; o__Anaerolineales; f__Anaerolineaceae; g__Longilinea; s__Longilinea arvoryzae	0	0	0	1	0	0	0	0	0	0	0	0	0	0	0	0	0	0	0	0	0	0	0	0	0	0	0	0	0	0	0	0	0	0	0	0	0	0	0	0	0	0	0	0	0	0
Ornatilinea apprima P3M-1	GCF_001306115.1	d__Bacteria; p__Chloroflexi; c__Anaerolineae; o__Anaerolineales; f__Anaerolineaceae; g__Ornatilinea; s__Ornatilinea apprima	d__Bacteria; p__Chloroflexota; c__Anaerolineae; o__Anaerolineales; f__Anaerolineaceae; g__Ornatilinea; s__Ornatilinea apprima	0	0	0	1	0	0	0	0	0	0	0	0	0	0	0	0	0	0	0	0	0	0	0	0	0	0	0	0	0	0	0	0	0	0	0	0	0	0	1	0	0	0	0	0	0	0
Thermanaerothrix daxensis GNS-1	GCF_001306145.1	d__Bacteria; p__Chloroflexi; c__Anaerolineae; o__Anaerolineales; f__Anaerolineaceae; g__Thermanaerothrix; s__Thermanaerothrix daxensis	d__Bacteria; p__Chloroflexota; c__Anaerolineae; o__Anaerolineales; f__Anaerolineaceae; g__Thermanaerothrix; s__Thermanaerothrix daxensis	0	0	0	0	0	0	0	0	0	0	0	0	0	0	0	0	0	0	0	0	0	0	0	0	0	0	0	0	0	0	0	0	0	0	0	0	0	1	0	0	0	0	0	0	0	0
Dehalococcoides mccartyi 195	GCF_000011905.1	d__Bacteria; p__Chloroflexi; c__Dehalococcoidia; o__Dehalococcoidales; f__Dehalococcoidaceae; g__Dehalococcoides; s__Dehalococcoides mccartyi	d__Bacteria; p__Chloroflexota; c__Dehalococcoidia; o__Dehalococcoidales; f__Dehalococcoidaceae; g__Dehalococcoides; s__Dehalococcoides mccartyi	0	0	0	0	0	0	0	0	0	0	0	0	0	0	0	0	0	0	0	0	0	0	0	0	0	0	0	0	0	0	0	0	0	0	0	0	0	0	0	0	0	0	0	0	0	0
Dehalococcoides mccartyi CG5	GCF_000830885.1	d__Bacteria; p__Chloroflexi; c__Dehalococcoidia; o__Dehalococcoidales; f__Dehalococcoidaceae; g__Dehalococcoides; s__Dehalococcoides mccartyi	d__Bacteria; p__Chloroflexota; c__Dehalococcoidia; o__Dehalococcoidales; f__Dehalococcoidaceae; g__Dehalococcoides; s__Dehalococcoides mccartyi_B	0	0	0	0	0	0	0	0	0	0	0	0	0	0	0	0	0	0	0	0	0	0	0	0	0	0	0	0	0	0	0	0	0	0	0	0	0	0	0	0	0	0	0	0	0	0
Dehalogenimonas alkenigignens IP3-3	GCF_001466665.1	d__Bacteria; p__Chloroflexi; c__Dehalococcoidia; o__; f__; g__Dehalogenimonas; s__Dehalogenimonas alkenigignens	d__Bacteria; p__Chloroflexota; c__Dehalococcoidia; o__Dehalococcoidales; f__Dehalococcoidaceae; g__Dehalogenimonas; s__Dehalogenimonas alkenigignens	0	0	0	0	0	0	0	0	0	0	0	0	0	0	0	0	0	0	0	0	0	0	0	0	0	0	0	0	0	0	0	0	0	0	0	0	0	0	0	0	0	0	0	0	0	0
Dehalogenimonas formicexedens NSZ-14	GCF_001953175.1	d__Bacteria; p__Chloroflexi; c__Dehalococcoidia; o__; f__; g__Dehalogenimonas; s__Dehalogenimonas formicexedens	d__Bacteria; p__Chloroflexota; c__Dehalococcoidia; o__Dehalococcoidales; f__Dehalococcoidaceae; g__Dehalogenimonas; s__Dehalogenimonas formicexedens	0	0	0	2	0	0	0	0	0	0	0	0	0	0	0	0	0	0	0	0	0	0	0	0	0	0	0	0	0	0	0	0	0	0	0	0	0	0	0	0	0	0	0	0	0	0
Dehalogenimonas lykanthroporepellens BL-DC-9	GCF_000143165.1	d__Bacteria; p__Chloroflexi; c__Dehalococcoidia; o__; f__; g__Dehalogenimonas; s__Dehalogenimonas lykanthroporepellens	d__Bacteria; p__Chloroflexota; c__Dehalococcoidia; o__Dehalococcoidales; f__Dehalococcoidaceae; g__Dehalogenimonas; s__Dehalogenimonas lykanthroporepellens	0	0	0	0	0	0	0	0	0	0	0	0	0	0	0	0	0	0	0	0	0	0	0	0	0	0	0	0	0	0	0	0	0	0	0	0	0	0	0	0	0	0	0	0	0	0
[truncated: 119 more columns]
